# Supplementary material for: Genome-Wide Mapping of Copy Number Variation in Humans: Comparative Analysis of High Resolution Array Platforms
Source: PLoS One. 2011 Nov 30;6(11):e27859. doi: 10.1371/journal.pone.0027859 (PMC3227574; doi:10.1371/journal.pone.0027859)
Supplement: Table S1 — Platform Specific Raw Data. This table contains the following information for each replicate of all microarray platforms; total number of CNV calls, total GS overlapping CNVs, sensitivity calculations (raw and corrected) and false discovery rate calculations. (XLS) [file pone.0027859.s003.xls]

## Sheet: 1000GP_GS
Platform	Replicate	Barcode	Analysis	Total # platform CNV calls	# TP (overlap with GS) per platform coords	# FP (total platform CNVs - TP)	PPV (TP/(TP+FP))	Average Platform PPV	Average Platform FDR	PPV Standard Deviation	#TP per GS coords	Total # GS CNVs	Total # GS CNVs detected by >0 platforms	# FN(raw) (col M- TP)	Sensitivity(raw) (TP/(TP+FN))	Average Platform Sensitivity(raw)	Sensitivity SD(raw)	# FN(corrected) (col N- TP)	Sensitivity(corrected) (TP/(TP+FN))	Average Platform Sensitivity(corrected)	Sensitivity SD (corrected)
NimbleGen 4.2M WG	1	449383	NS2.6	425	83	342	0.195294	0.191195	0.808805	0.00409867	108	3997	685	3889	0.0270203	0.0276457	0.000625469	577	0.157664	0.161314	0.00364964
	2	450376	NS2.6	465	87	378	0.187097				113	3997	685	3884	0.0282712			572	0.164964
NimbleGen 4.2M CNV	1	511345	NS2.6	1926	408	1518	0.211838	0.208415	0.791585	0.00342299	452	3997	685	3545	0.113085	0.109457	0.00362772	233	0.659854	0.638686	0.0211679
	2	511419	NS2.6	1883	386	1497	0.204992				423	3997	685	3574	0.105829			262	0.617518
NimbleGen 2.1M WG	1	456639	NS2.6	498	73	425	0.146586	0.154206	0.845794	0.00761969	132	3997	685	3865	0.0330248	0.0322742	0.000750563	553	0.192701	0.188321	0.00437956
	2	456640	NS2.6	482	78	404	0.161826				126	3997	685	3871	0.0315236			559	0.183942
NimbleGen 2.1M WG (pool)	1	380936	NS2.6	229	47	182	0.20524	0.189999	0.810001	0.0152414	75	3997	685	3922	0.0187641	0.0132599	0.00550413	610	0.109489	0.0773723	0.0321168
	2	381026	NS2.6	103	18	85	0.174757				31	3997	685	3966	0.00775582			654	0.0452555
NimbleGen 2.1M CNV	1	358846	NS2.6	1939	286	1653	0.147499	0.149216	0.850784	0.00171758	328	3997	685	3669	0.0820615	0.0846885	0.00262697	357	0.478832	0.494161	0.0153285
	2	364071	NS2.6	1981	299	1682	0.150934				349	3997	685	3648	0.0873155			336	0.509489
NimbleGen 2.1M CNV (pool)	1	371765	NS2.6	481	66	415	0.137214	0.120673	0.879327	0.016541	70	3997	685	3927	0.0175131	0.0178884	0.000375281	615	0.10219	0.10438	0.00218978
	2	371840	NS2.6	605	63	542	0.104132				73	3997	685	3924	0.0182637			612	0.106569
NimbleGen 3x720K WG	1	456638A01	NS2.6	206	24	182	0.116505	0.127771	0.872229	0.0112663	49	3997	685	3948	0.0122592	0.0123843	0.000125094	636	0.0715328	0.0722628	0.000729927
	2	456638A03	NS2.6	187	26	161	0.139037				50	3997	685	3947	0.0125094			635	0.0729927
NimbleGen 3x720K CNV	1	360932A01	NS2.6	819	160	659	0.19536	0.197457	0.802543	0.00209694	194	3997	685	3803	0.0485364	0.0501626	0.00162622	491	0.283212	0.292701	0.00948905
	2	360932A03	AGW6.5	897	179	718	0.199554				207	3997	685	3790	0.0517888			478	0.30219
Agilent 1x1M CGH	1	US84703594_252152927498_S01_CGH_107_Sep09	AGW6.5	825	57	768	0.0690909	0.0681063	0.931894	0.00098459	85	3997	685	3912	0.0212659	0.0210158	0.000250188	600	0.124088	0.122628	0.00145985
	2	US84703594_252152927499_S01_CGH_107_Sep09	AGW6.5	879	59	820	0.0671217				83	3997	685	3914	0.0207656			602	0.121168
Agilent 1x1M High Resolution	1	US84703594_252364210846_S01_CGH_107_Sep09	AGW6.5	1566	91	1475	0.0581098	0.0571098	0.94289	0.00100005	140	3997	685	3857	0.0350263	0.0349012	0.000125094	545	0.20438	0.20365	0.000729927
	2	US84703594_252364210847_S01_CGH_107_Sep09	AGW6.5	1604	90	1514	0.0561097				139	3997	685	3858	0.0347761			546	0.20292
Agilent 2x400K CNV	1	277-005_252136511235_2	AGW6.5	1055	49	1006	0.0464455	0.087095	0.912905	0.0406495	70	3997	685	3927	0.0175131	0.0311484	0.0136352	615	0.10219	0.181752	0.079562
	2	277-005_252136511236_2	AGW6.5	1002	128	874	0.127745				179	3997	685	3818	0.0447836			506	0.261314
Agilent 2x400K CGH+SNP	1	252808110103_1_2	AGW6.5	120	4	116	0.0333333	0.0365079	0.963492	0.0031746	7	3997	685	3990	0.00175131	0.00187641	0.000125094	678	0.010219	0.0109489	0.000729927
	2	252808110107_1_2	AGW6.5	126	5	121	0.0396825				8	3997	685	3989	0.0020015			677	0.0116788
Illumina Omni1Quad	1	4787234076	cnvPartition2.4.4	251	62	189	0.247012	0.250847	0.749153	0.00383485	73	3997	685	3924	0.0182637	0.0198899	0.00162622	612	0.106569	0.116058	0.00948905
	2	4787234077	cnvPartition2.4.4	267	68	199	0.254682				86	3997	685	3911	0.0215161			599	0.125547
Affymetrix SNP 6.0		McCarroll	Birdseed	162	49	113	0.302469	0.302469	0.697531	0	75	3997	685	3922	0.0187641	0.0187641	0	610	0.109489	0.109489	0

## Sheet: 42M_GS
Platform	Replicate	Barcode	Analysis	Total # platform CNV calls	# TP (overlap with GS)	# FP (total platform CNVs - TP)	PPV (TP/(TP+FP))	Average Platform PPV	Average Platform FDR	Standard Deviation	#TP per GS coords	Total # GS CNVs	Total # GS CNVs detected by >0 platforms	# FN(raw) (col M- TP)	Sensitivity(raw) (TP/(TP+FN))	Average Platform Sensitivity(raw)	Sensitivity SD(raw)	# FN(corrected) (col N- TP)	Sensitivity(corrected) (TP/(TP+FN))	Average Platform Sensitivity(corrected)	Sensitivity SD(corrected)
NimbleGen 4.2M WG	1	449383	NS2.6	425	115	310	0.270588	0.255724	0.744276	0.014864	112	756	456	644	0.148148	0.149471	0.00132275	344	0.245614	0.247807	0.00219298
	2	450376	NS2.6	465	112	353	0.24086				114	756	456	642	0.150794			342	0.25
NimbleGen 4.2M CNV	1	511345	NS2.6	1926	310	1616	0.160955	0.153499	0.846501	0.0074559	282	756	456	474	0.373016	0.357143	0.015873	174	0.618421	0.592105	0.0263158
	2	511419	NS2.6	1883	275	1608	0.146044				258	756	456	498	0.34127			198	0.565789
NimbleGen 2.1M WG	1	456639	NS2.6	498	98	400	0.196787	0.196941	0.803059	0.000154144	90	756	456	666	0.119048	0.119709	0.000661376	366	0.197368	0.198465	0.00109649
	2	456640	NS2.6	482	95	387	0.197095				91	756	456	665	0.12037			365	0.199561
NimbleGen 2.1M WG (pool)	1	380936	NS2.6	229	64	165	0.279476	0.246534	0.753466	0.0329419	63	756	456	693	0.0833333	0.0568783	0.026455	393	0.138158	0.0942982	0.0438596
	2	381026	NS2.6	103	22	81	0.213592				23	756	456	733	0.0304233			433	0.0504386
NimbleGen 2.1M CNV	1	358846	NS2.6	1939	251	1688	0.129448	0.128581	0.871419	0.000867447	252	756	456	504	0.333333	0.328042	0.00529101	204	0.552632	0.54386	0.00877193
	2	364071	NS2.6	1981	253	1728	0.127713				244	756	456	512	0.322751			212	0.535088
NimbleGen 2.1M CNV (pool)	1	371765	NS2.6	481	21	460	0.043659	0.0664576	0.933542	0.0227986	22	756	456	734	0.0291005	0.047619	0.0185185	434	0.0482456	0.0789474	0.0307018
	2	371840	NS2.6	605	54	551	0.0892562				50	756	456	706	0.0661376			406	0.109649
NimbleGen 3x720K WG	1	456638A01	NS2.6	206	29	177	0.140777	0.147928	0.852072	0.00715176	32	756	456	724	0.042328	0.042328	0	424	0.0701754	0.0701754	0
	2	456638A03	NS2.6	187	29	158	0.15508				32	756	456	724	0.042328			424	0.0701754
NimbleGen 3x720K CNV	1	360932A01	NS2.6	819	166	653	0.202686	0.200563	0.799437	0.00212348	161	756	456	595	0.212963	0.219577	0.00661376	295	0.35307	0.364035	0.0109649
	2	360932A03	AGW6.5	897	178	719	0.198439				171	756	456	585	0.22619			285	0.375
Agilent 1x1M CGH	1	US84703594_252152927498_S01_CGH_107_Sep09	AGW6.5	825	94	731	0.113939	0.100201	0.899799	0.0137388	80	756	456	676	0.10582	0.102513	0.00330688	376	0.175439	0.169956	0.00548246
	2	US84703594_252152927499_S01_CGH_107_Sep09	AGW6.5	879	76	803	0.0864619				75	756	456	681	0.0992063			381	0.164474
Agilent 1x1M High Resolution	1	US84703594_252364210846_S01_CGH_107_Sep09	AGW6.5	1566	114	1452	0.0727969	0.0697526	0.930247	0.00304435	101	756	456	655	0.133598	0.130952	0.0026455	355	0.221491	0.217105	0.00438596
	2	US84703594_252364210847_S01_CGH_107_Sep09	AGW6.5	1604	107	1497	0.0667082				97	756	456	659	0.128307			359	0.212719
Agilent 2x400K CNV	1	277-005_252136511235_2	AGW6.5	1055	158	897	0.149763	0.166698	0.833302	0.0169349	118	756	456	638	0.156085	0.17328	0.0171958	338	0.258772	0.287281	0.0285088
	2	277-005_252136511236_2	AGW6.5	1002	184	818	0.183633				144	756	456	612	0.190476			312	0.315789
Agilent 2x400K CGH+SNP	1	252808110103_1_2	AGW6.5	120	15	105	0.125	0.125992	0.874008	0.000992063	15	756	456	741	0.0198413	0.0198413	0	441	0.0328947	0.0328947	0
	2	252808110107_1_2	AGW6.5	126	16	110	0.126984				15	756	456	741	0.0198413			441	0.0328947
Illumina Omni1Quad	1	4787234076	cnvPartition2.4.4	251	122	129	0.486056	0.471492	0.528508	0.0145635	123	756	456	633	0.162698	0.161376	0.00132275	333	0.269737	0.267544	0.00219298
	2	4787234077	cnvPartition2.4.4	267	122	145	0.456929				121	756	456	635	0.160053			335	0.265351
Affymetrix SNP 6.0		McCarroll	Birdseed	162	67	95	0.41358	0.41358	0.58642	0	70	756	456	686	0.0925926	0.0925926	0	386	0.153509	0.153509	0
